# Supplementary material for: Large-scale genomic analysis shows association between homoplastic genetic variation in Mycobacterium tuberculosis genes and meningeal or pulmonary tuberculosis
Source: PubMed Central journal article supplement (PMC5800017; doi:10.1186/s12864-018-4498-z), 2018-02-05

**Terminal branch set**

**Lineage**

- Indo-Oceanic
- Euro-American
- East-Asian

**Rv0218**

- 261869CT

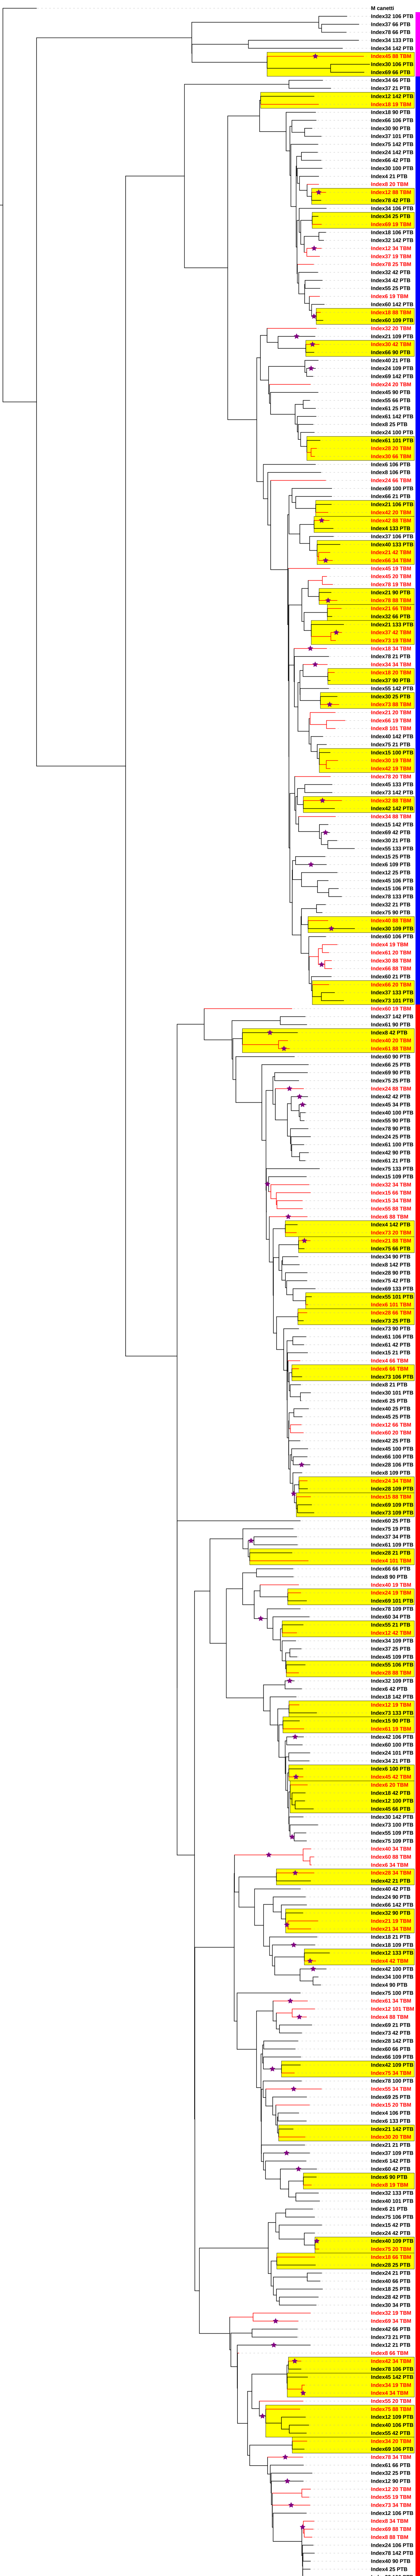

Supplement: 12864_2018_4498_MOESM6_ESM.pdf [file 12864_2018_4498_MOESM6_ESM.pdf]
